# Supplementary material for: Taylor dispersion analysis as a tool for size measurement of PAMAM dendrimers: the effect of generation, functionality and pH
Source: Royal Society of Chemistry journal article supplement (doi:10.1039/d4ay01769b), 2024-11-14
Supplement: d4ay01769b1.pdf [file d4ay01769b1.pdf]

# Taylor Dispersion Analysis as a tool for size measurement of PAMAM dendrimers: the effect of generation, functionality and pH

Vikesh Chhabria<sup>2\*</sup>, Zhengyuan Zhou<sup>1</sup>, Robert Forbes<sup>1</sup>

<sup>1</sup>School of Pharmacy and Biomedical sciences, Maudland building, University of Central Lancashire, Preston, Lancashire PR1 2HE

<sup>2</sup>Current address, School of Biosciences, Sir Martin Evans Building, Cardiff University, Cardiff, CF10 3AX

## Corresponding author

\*Email Address: [ChhabriaV2@cardiff.ac.uk](mailto:ChhabriaV2@cardiff.ac.uk), [Vikeshc@gmail.com](mailto:Vikeshc@gmail.com)

## Table of contents

|                             |   |
|-----------------------------|---|
| Supporting information..... | 2 |
| TDA Profiles.....           | 2 |
| Fig. S1.....                | 2 |
| Fig. S2.....                | 2 |

## Supporting information

### TDA profiles

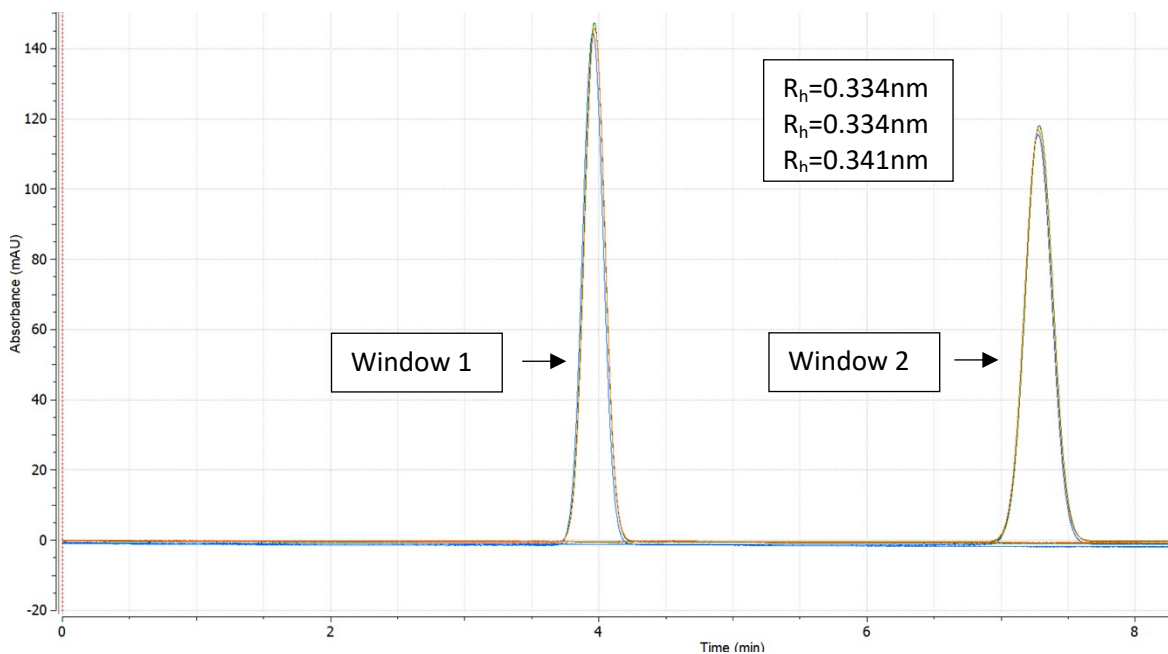

**Figure S1.** A taylorgram for a 1mg/ml caffeine standard solution in water at 25°C, recorded at 214 nm, showing a triplicate run, indicating the first and second passes at window 1 and 2 (n=3).

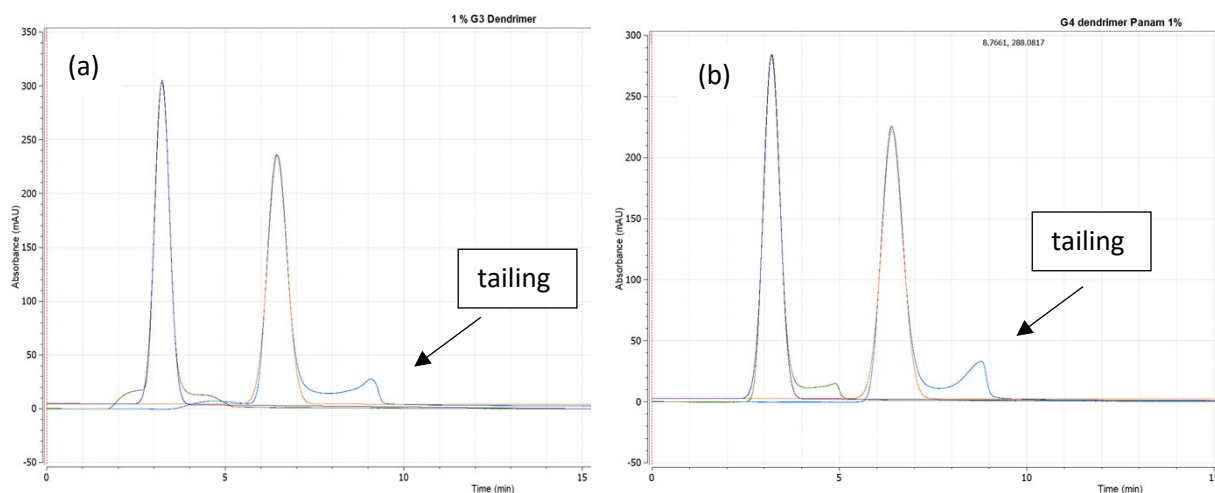

**Figure S2.** (a) TDA profile of a 1% G3 PAMAM dendrimer in PBS (pH 7.4), showing interaction with the capillary wall, indicated by presence of a tail. (b) TDA profile of a 1% G4 PAMAM dendrimer in PBS (pH 7.4), showing interaction with the capillary wall, indicated by the presence of a tail.
